# Supplementary material
Source: PubMed Central journal article supplement (PMC5592654)

**Isoform and cell type-specific structure of Apolipoprotein E lipoparticles as revealed by a novel  
Forster Resonance Energy Transfer assay**

Eleanna Kara, Jordan D. Marks, Zhanyun Fan, Jacob A. Klickstein, Allyson D. Roe, Kelly A. Krogh,  
Susanne Wegmann, Masato Maesako, Christina C. Luo, Ravi Mylvaganam, Oksana Berezovska, Eloise  
Hudry, Bradley T. Hyman

**List of supplementary material:**

Supplementary figure S1

Supplementary figure S2

## Supplementary figure 1

Percentage of Dynabeads that was positive for ApoE (unnormalized values).

The ApoE analyzed in those experiments was secreted from HEK cells and astrocytes that were transfected with tagged ApoE. Each of these experiments for DiD was repeated 9 times for HEK cells and 7 times for astrocytes. Scatter plots indicate mean $\pm$  SD (standard deviation).

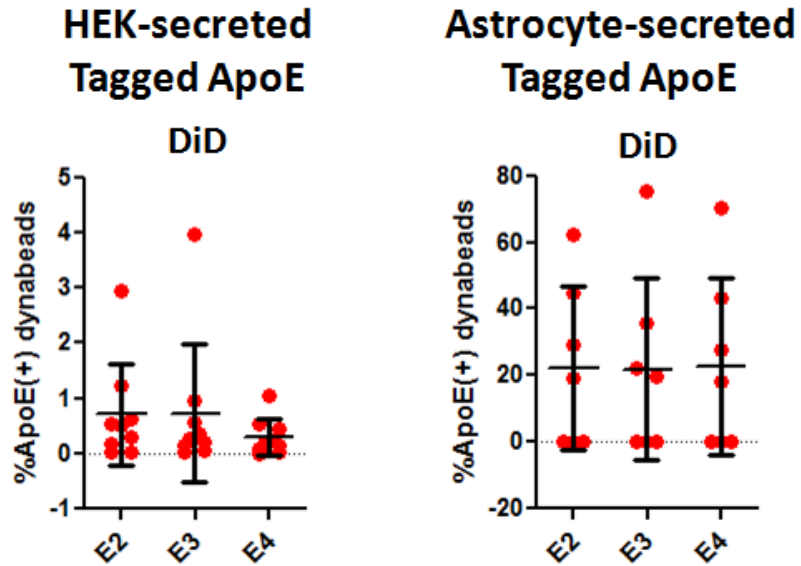

## Supplementary figure 2

- Dose-response of lipid dyes to lipid concentration (cell concentration). The cell number was determined through flow cytometry. The lipid dye concentrations were 100ug/ml for filipin and MB and 10ug/ml for DiD.
- Dose-response of lipid dyes to lipid dye concentration. The lipid dye concentrations used were as follows: DiD: 0.013, 0.01, 0.007, 0.005, 0.003, 0.002, 0.001, 0.0005mg/ml; filipin: 0.3, 0.2, 0.1, 0.05, 0.025, 0.01mg/ml; MB: 0.2, 0.1, 0.07, 0.03, 0.017mg/ml. The blue dot indicates the lipid dye concentration that was used in the lipidation experiments in figure 4 and in supplementary figure 2a.

Scatter plots indicate mean $\pm$  SD (standard deviation). MFI=mean fluorescent intensity; FI=fluorescence intensity; MB= Marina Blue 1,2-dihexadecanoyl- sn -glycero-3-phosphoethanolamine.

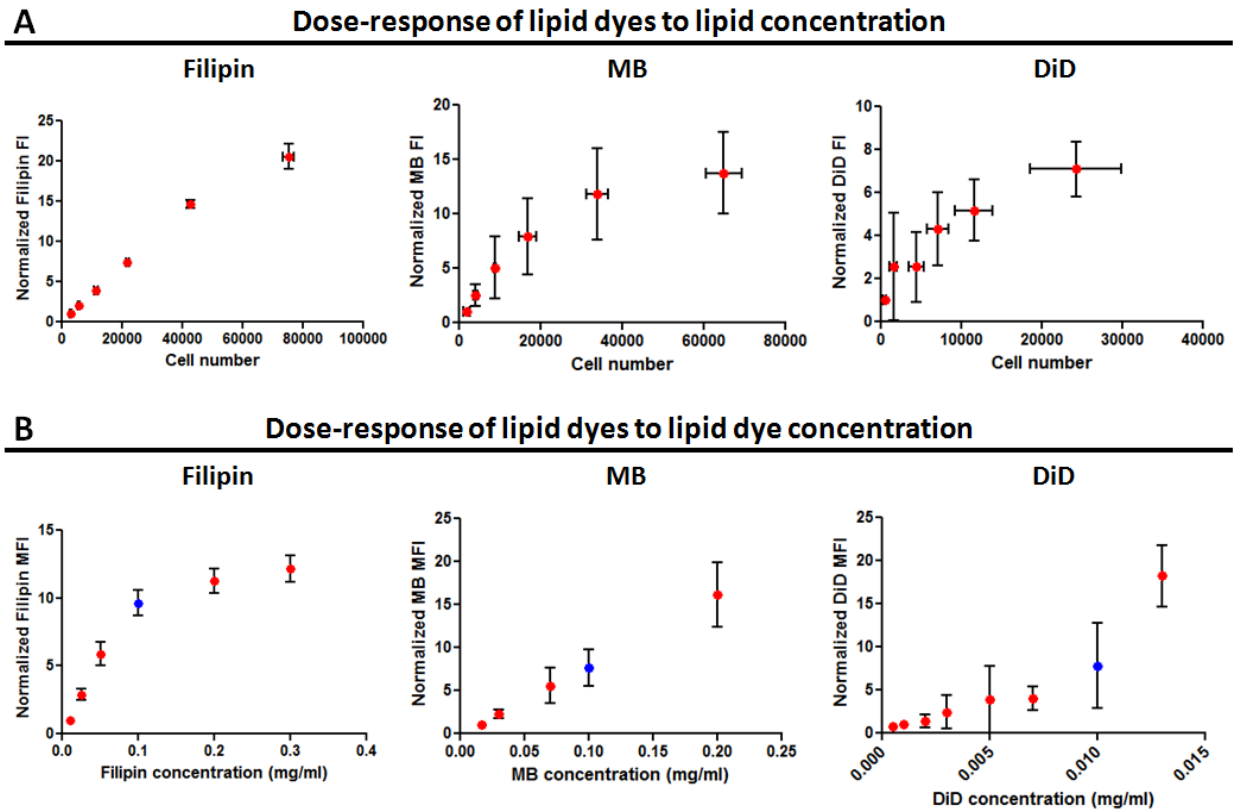

Supplement: supp_M117.784264_Supp_figs.pdf [file supp_M117.784264_Supp_figs.pdf]
